## RESEARCH ARTICLE

# Intrinsic factors of *Peltigera* lichens influence the structure of the associated soil bacterial microbiota

Diego Leiva, Claudia Clavero-León, Margarita Carú and Julieta Orlando\*

Laboratory of Microbial Ecology, Department of Ecological Sciences, Faculty of Sciences, Universidad de Chile, Santiago 7800003, Chile

\*Corresponding author: Departamento de Ciencias Ecológicas, Facultad de Ciencias, Universidad de Chile, Las Palmeras 3425, Casilla 653, Ñuñoa, Santiago 7800003, Chile. Tel: +56-2-29787401; Fax: +56-2-22727363. E-mail: [jorlando@u.uchile.cl](mailto:jorlando@u.uchile.cl)**One sentence summary:** Lichen intrinsic and extrinsic factors shape the structure of the bacterial communities associated with lichens and the soil underneath them in a forested environmental context in Chilean Patagonia.

Editor: Angela Sessitsch

## ABSTRACT

Definition of lichens has evolved from bi(tri)partite associations to multi-species symbioses, where bacteria would play essential roles. Besides, although soil bacterial communities are known to be affected by edaphic factors, when lichens grow upon them these could become less preponderant. We hypothesized that the structure of both the lichen microbiota and the microbiota in the soil underneath lichens is shaped by lichen intrinsic and extrinsic factors. In this work, intrinsic factors corresponded to mycobiont and cyanobiont identities of *Peltigera* lichens, metabolite diversity and phenoloxidase activity and extrinsic factors involved the site of the forest where lichens grow. Likewise, the genetic and metabolic structure of the lichen and soil bacterial communities were analyzed by fingerprinting. Among the results, metabolite diversity was inversely related to the genetic structure of bacterial communities of lichens and soils, highlighting the far-reaching effect of these substances; while phenoloxidase activity was inversely related to the metabolic structure only of the lichen bacterial microbiota, presuming a more limited effect of the products of these enzymes. Soil bacterial microbiota was different depending on the site and, strikingly, according to the cyanobiont present in the lichen over them, which could indicate an influence of the photobiont metabolism on the availability of soil nutrients.

**Keywords:** terricolous cyanolichens; metabolite diversity; phenoloxidase activity; microbiota structure; *Nothofagus* forest; Chile

## INTRODUCTION

Beyond the apparent self-sustaining status of lichens by its classical components (i.e. mycobiont and photobionts), and the general statement that they obtain their nutrients directly from the atmosphere and not from the substrate, these organisms might also get vital components with the help of other microbial members present on their thalli and in the surrounding environment (Grube *et al.* 2015; Sigurbjörnsdóttir, Andrésson and Vilhelmsson 2015; Spribille *et al.* 2016). In fact, difficulties on lichen culturing could be partly explained due to their nutritional dependence on

the lichen-associated microbiota (Grube *et al.* 2015). However, the lichen microbiota could be playing not only roles in extra nutrient cycling, but also in defense/allelopathy against specific microbial groups such as pathogens (Hodkinson *et al.* 2012; Cernava *et al.* 2015). Accordingly, lichen symbioses have been proposed as resembling microecosystems (Grube *et al.* 2009; Hodkinson and Lutzoni 2009), comprising photobionts as producers, mycobionts as consumers and bacteria as contributors to nutrient acquisition, recycling and antagonism against other microbial groups (Aschenbrenner *et al.* 2016; Sigurbjörnsdóttir, Andrésson and Vilhelmsson 2016).

Several authors have stated that bacterial communities associated with the lichen thallus are not a mere extension of those found in the substrate where the lichens grow, but can be considered as an additional component of the traditional symbiosis, mainly due to the similarity in abundance and the presence of specific groups of bacteria throughout different lichens (Bates et al. 2011; Cardinale et al. 2012; Printzen et al. 2012). Even more, a new group of Rhizobiales (LAR1) has been found as an exclusive member of the lichen microbiota (Hodkinson and Lutzoni 2009).

Several factors have been identified as descriptors of the structure of the lichen bacterial microbiota; among them, lichen intrinsic factors such as mycobiont identity (Grube and Berg 2009; Bates et al. 2011) and photobiont type (Hodkinson et al. 2012) and extrinsic factors such as biogeography and environmental context (Cardinale et al. 2008, 2012; Hodkinson et al. 2012; Printzen et al. 2012; Ramírez-Fernández et al. 2014). Nevertheless, the influence of these factors on the microbiota present in the substrate beneath the lichens has rarely been assessed, being roughly restricted to reports about rock or soil biological crusts (Bjelland et al. 2011; Castillo-Monroy et al. 2011; Bastida et al. 2014; Maier et al. 2014). These studies become important when considering that lichens act as generators of ecological niches for bacterial communities, either within the thalli or in the substrate below them (Bjelland et al. 2011).

Therefore, we hypothesized that both intrinsic and extrinsic lichen factors shape the structure, not only of the lichen bacterial microbiota (hereinafter referred to as lichen microbiota) but also of the soil bacterial microbiota underneath the lichen thallus (hereinafter referred to as soil microbiota), the former being more affected by intrinsic factors and the latter by extrinsic ones. We tested this hypothesis by the use of fingerprinting techniques at genetic and metabolic levels on terricolous *Peltigera* lichens growing in two sites of a native second-growth forest of *Nothofagus pumilio* (Poepp. & Endl.) Krasser 1896 in Chilean Patagonia (Till-Bottraud, Fajardo and Rioux 2012).

Lichens of the genus *Peltigera* are present in all continents; in Chile, only bipartite *Peltigera* cyanolichens have been reported (Martínez et al. 2003; Quilhot et al. 2012; Ramírez-Fernández et al. 2013; Zúñiga et al. 2015). In the case of *N. pumilio* forests in Chilean Patagonia, it has been described that their conservation stage had an influence on the diversity of *Peltigera* lichens growing in them (i.e. mature and young forests had higher diversity than grasslands derived from logged forests) (Ramírez-Fernández et al. 2013), which in turn affected the lichen-associated microbiota (Ramírez-Fernández et al. 2014). Nevertheless, the influence of *Peltigera* intrinsic factors on the soil microbiota where the lichens grow has not been evaluated.

Lichens in general are great producers of secondary metabolites, mainly by polymalonate, shikimate and mevalonate pathways (Boustie and Grube 2005). These metabolites could have antibiotic and allelopathic roles (e.g. Manojlović et al. 2012; Lokajová, Bačkorová and Bačkor 2014; Cernava et al. 2015), so it is expected that they affect the structure of the bacterial communities around the lichen thallus (Molnár and Farkas 2010; Hodkinson et al. 2012). However, *Peltigera* lichens are poor producers of these metabolites, and it has been proposed that phenoloxidase activity (e.g. laccases and tyrosinases) could provide a functional compensation because of the high oxidative capacity of their products (Beckett, Zavarzina and Liers 2003; Lisov et al. 2012), possibly acting allelopathically against certain bacterial groups.

In this study, we propose to analyze the influence of lichen intrinsic factors (specifically symbiont identities, metabolite production and phenoloxidase activity) and lichen extrinsic factors (the site of the forest where the lichens grow) in shaping the

**Table 1.** Distribution of symbiont pairs and conformation of samples.

| Site   | Mycobiont | Cyanobiont | n   | Sample code |
|--------|-----------|------------|-----|-------------|
| Site 1 | M5        | C01        | 10  | S1M5C01     |
|        |           | C14        | 1   | S1M5C14     |
|        | M6        | C01        | 12  | S1M6C01     |
|        |           | M8         | C10 | 2           |
| Site 2 | M1        | C03        | 1   | S2M1C03     |
|        | M2        | C03        | 1   | S2M2C03     |
|        | M4        | C03        | 2   | S2M4C03     |
|        |           | C01        | 11  | S2M5C01     |
|        | M5        | C03        | 3   | S2M5C03     |
|        |           | C01        | 6   | S2M6C01     |
|        | M6        | C01        | 6   | S2M6C01     |
|        | M8        | C12        | 1   | S2M8C12     |

M: Mycobiont haplotype, C: Cyanobiont haplotype, n: number of thalli with those M and C haplotypes, in that site.

structure of bacterial communities associated with *Peltigera* thallus (i.e. lichen and soil microbiota).

## MATERIALS AND METHODS

### Study sites and sampling

A total of 50 *Peltigera*-thallus fragments (~15 cm<sup>2</sup>) and their associated substrate (i.e. soil) (~15 cm<sup>3</sup>) were collected from two plots (~2 ha each), 300 m away from each other in a fragmented second-growth forest of *N. pumilio* (Till-Bottraud, Fajardo and Rioux 2012) at the Coyhaique National Reserve (Aysén Region, Chile; 45°31'42.96"S, 72°1'51.95"W; hereinafter referred to as Coyhaique). These two sites are close to pine tree plantations and differ from each other regarding their surrounding areas, site 2 being nearer than site 1 to open spaces such as rocky hillsides and a mallín (a kind of wetland). Lichen samples included in this study correspond to a subset of those previously reported by Zúñiga et al. (2015), in which the symbiont identity of these and other *Peltigera* lichens was determined. All samples were collected at least 1 m from the next closest thallus in order to minimize resampling of the same genetic individual.

### Operational taxonomic units

The mycobiont and cyanobiont operational taxonomic units (OTUs) were defined as those groups of sequences that were 100% identical (nucleotide identity), using a distance analysis in Mega 5.2 software (Tamura et al. 2011). OTUs for mycobionts (based on concatenated sequences of LSU-SSU rRNA genes) and cyanobionts (based on SSU rRNA gene sequences) correspond to those published in Zúñiga et al. (2015), where they were named by an M or a C, respectively, followed by a number considering their order in the phylogenetic analyses (Table 1).

In the following methodologies, except the pre-treatment and DNA extraction, samples were organized according to their origin and symbiont identities. As can be seen in Table 1, this arrangement gave 11 samples originated from pooling different individuals, resulting in some composed of more than 10 single thalli/soils while others were represented by a single thallus/soil portion. Although lack of homogeneity due to this unequal composite size could not be totally discarded, the criteria for combining the samples are considered the key descriptors of the diversity of the bacterial communities studied in this work. Thus, it is expected that these communities are sufficiently homogeneous to justify their combination.

## Pre-treatment of the samples and DNA extraction

Soil superficially associated with the collected portion of each thallus was removed with a brush and a spatula. Then, 80–100 mg of each cleaned thallus portion was mechanically fractioned with a minigrinder, and DNA was extracted using the PowerSoil DNA Isolation kit (MoBio Laboratories Inc., CA, USA) according to the manufacturer's instructions. In addition, DNA from 100 to 150 mg of the soil sample removed from each lichen thallus was extracted using the same kit. Quality and integrity of the extracted DNA were visualized in 0.8% (w/v) agarose gels in TAE 1X buffer (40 mM Tris-acetate, 1 mM EDTA [pH 8.0]) stained with GelRed (Biotium, CA, USA). All DNA samples were stored in TE buffer (Tris-HCl 10 mM and EDTA 1 mM [pH 8.0]) at  $-20^{\circ}\text{C}$  until further analysis.

## Determination of lichen metabolites

Metabolites of the 11 lichen samples were determined by using bidimensional thin-layer chromatography (2D-TLC), based on descriptions by Culbertson (1972) and modified by Menlove (1974). Compounds were extracted 5 min on hexane, 1 mL loaded on pre-coated silica gel 60 F254 aluminum plates (Merck, Darmstadt, Germany), and resolved in the solvent system EHF (diethyl ether : hexane : formic acid; 300 : 100 : 3 v/v/v) and TA (toluene : acetic acid; 20 : 3 v/v) as first and second dimension, respectively (Tønnsberg and Holtan-Hartwig 1983), allowing the plates to dry for 10 min between each run. Metabolites were revealed under daylight, fixed by spraying the plate with sulfuric acid (10%) and then heated in an oven for 5 min at  $110^{\circ}\text{C}$  (Miadlikowska and Lutzoni 2000). In order to normalize migrations, spot distances from the origin were measured on both dimensions, and relativized to a spot present in every sample which appeared on the same region in each plate and had the same color on visible light. Then, relative retention factors (rRf) for each spot were obtained. In addition, visible light color (orange, blue, gray or other) and sulfuric acid reaction (positive or negative) of each spot were tabulated using a numeric code. This information was used in order to calculate similarities between samples, based on a neighbor-joining grouping analysis in PAST software v3.11 (Hammer, Harper and Ryan 2001). Subsequently, each cluster from the grouping analysis was considered as a different spot group, and the number of spots (i.e. abundance) in every group was used for calculating the Shannon (H') index of each sample in order to obtain a value reflecting the metabolite profile of each sample.

## Quantification of phenoloxidase activity

Phenoloxidase activity was measured by quantifying the product of 2'-azino-bis-[3-ethylbenzotiazol-6-sulfonic] acid (ABTS) oxidation at 436 nm in 96-well plate assays, adapting the methods described by Laufer et al. (2006) and Zavarzina and Zavarzin (2006). From each sample, 8 mg of lichen thalli were homogenized using a minigrinder, and suspended in 300  $\mu\text{L}$  of sodium acetate buffer 25 mM (pH 6). The homogenate was centrifuged at  $7000 \times g$  5 min, and the supernatant was stored in 20% glycerol at  $-20^{\circ}\text{C}$  until its use.

The enzymatic assay was carried out in duplicate with 500 ng of total protein per sample (quantified by the Bradford method). For that, 200  $\mu\text{L}$  of sodium acetate buffer was added and then incubated 10 min at  $22^{\circ}\text{C}$ . In parallel, abiotic controls were assayed by adding 50  $\mu\text{L}$  of 5 mM sodium azide (final concentration 1 mM) and 150  $\mu\text{L}$  of sodium acetate buffer. Then, 50  $\mu\text{L}$  of 2.5 mM

ABTS (Sigma-Aldrich, MO, USA) was added (final concentration 0.5 mM).

The green coloration was measured at 436 nm ( $\epsilon_{436} = 29 \text{ mM}^{-1} \text{ cm}^{-1}$ ) in an Epoch microplate reader (Biotek, VT, USA). A phenoloxidase activity unit (U) was defined as micromoles of ABTS enzymatically oxidized by minute (subtracting the abiotic control value).

## Terminal restriction fragment length polymorphism

Genetic structure of bacterial communities was determined by obtaining terminal restriction fragment length polymorphisms (TRFLP). For that, from the isolated DNA of the fragments of lichen thalli and their corresponding soils, bacterial SSU rRNA gene was amplified with forward primer 895F (Hodkinson and Lutzoni 2009), which excludes plastids and cyanobacteria, and reverse primer rP2 (Weisburg et al. 1991) labeled with 6-FAM (6-carboxyfluorescein) at the 5' end. PCR mixes were prepared using GoTaq<sup>®</sup> Green Master Mix (GoTaq DNA polymerase in 1X Green GoTaq Reaction Buffer [pH 8.5], 200  $\mu\text{M}$  of each dNTP and 1.5 mM  $\text{MgCl}_2$ ) (Promega, WI, USA) and amplified in a Maxygene thermocycler (Axygen, CA, USA). Cycling conditions consisted in an initial denaturalization step at  $94^{\circ}\text{C}$  for 3 min; then 30 cycles of  $94^{\circ}\text{C}$  for 30 s,  $42^{\circ}\text{C}$  for 30 s and  $72^{\circ}\text{C}$  for 1 min 30 s; and finally an extension at  $72^{\circ}\text{C}$  for 10 min. Quality and size of the amplicons were determined electrophoretically as described above except that 1.2% (w/v) agarose gels were used.

Amplicons were purified using the Wizard<sup>®</sup> SV Gel and PCR Clean-Up System kit (Promega, WI, USA), and were independently incubated with three different restriction enzymes: *AluI*, *BsuRI* and *HhaI* (Thermo Fisher Scientific, MA, USA) according to the manufacturer's instructions. After an alcohol DNA precipitation, products were resuspended in TE buffer and fragments were analyzed by capillary electrophoresis on an automated Genetic Analyzer ABI3730XL (Applied Biosystems; MacroGen Inc., Seoul, Korea). Size, height and area of the terminal restriction fragments (TRFs) were determined by comparison with the GeneScan 1200 LIZ<sup>®</sup> size-standard in GeneMapper software v3.7 (Applied Biosystems, CA, USA).

Only fragments of 30 bp or longer were considered in the data analysis, in order to discard peaks corresponding to PCR primers. Patterns from different samples were normalized to homogenize the total fluorescence units by an iterative standardization procedure. Additionally, profiles were manually aligned to avoid erroneous identification of TRFs by the expected shift in fragment sizes due to electrophoresis. Finally, the relative abundance of each TRF, as percentage, was determined by calculating the ratio between the height of the peak and the normalized total peak height of each sample.

## Community level physiological profiles

Metabolic structure of bacterial communities was determined by obtaining the community level physiological profiles (CLPP) using EcoPlate (BioLog<sup>®</sup>, CA, USA), consisting of 96-well microplates with 31 different carbon sources plus one blank control, in triplicate.

In order to generate microbial suspensions from lichens, 100 mg of thalli from each sample were homogenized in 15 mL of PBS buffer (137 mM NaCl, 2.7 mM KCl, 8 mM  $\text{Na}_2\text{HPO}_4$ , 2 mM  $\text{KH}_2\text{PO}_4$ ) and shaken overnight at 150 rpm and  $25^{\circ}\text{C}$ . Similarly, microbial suspensions from substrates were obtained from 2 g of soil, which was agitated at 150 rpm and  $25^{\circ}\text{C}$  for 1 h in 20 mL of PBS buffer. Then, lichen and soil suspensions were filtrated,

100  $\mu$ L inoculated in each well of the corresponding microplate and incubated at 25°C for 1 week in a humid chamber. Bacterial community consumption of the carbon sources reduces a tetrazolium dye, whose purple coloration was daily measured at 590 nm in an Epoch microplate reader (Biotek).

Therefore, data were processed by subtracting the absorbance value at time zero, to minimize the interference of the sample color (Insam and Goberna 2004), and the absorbance value from the control (water). In the data analysis, absorbance values of 0.1 or higher were considered positive according to the detection limit of the reader.

The average well color development was calculated on each plate during the incubation time of the plates, and data were adjusted using the modified Gompertz equation (Zwietering et al. 1990) using OriginPro software v8.07 (OriginLab Corporation, MA, USA), in order to determine the incubation time when all the communities were in the exponential phase of each curve.

## Data analyses

Based on the genetic and metabolic fingerprinting data, the structure of the bacterial communities (i.e. lichen and soil microbiota) was calculated using the Shannon ( $H'$ ) index. On the other hand, the similarity between these bacterial communities, considering their genetic and metabolic structures, was determined by principal component analyses (PCA) based on the Bray–Curtis dissimilarity index. In addition, analysis of similarity (ANOSIM) and similarity percentages (SIMPER) were calculated between the lichen and soil bacterial communities, grouping them independently by site, mycobiont and cyanobiont identities. All these analyses were done using PAST software v 3.11 (Hammer, Harper and Ryan 2001).

Finally, linear regressions between metabolite diversity, phenoloxidase activity and the structures of the bacterial communities were performed. For this, metabolite diversity and phenoloxidase activity were used as independent variables, while indices of genetic (TRFLP) and metabolic (CLPP) structures were used as dependent variables. These analyses were done in Graphpad Prism software v5.01 (Graphpad Software Inc., CA, USA).

## RESULTS

### Identity of lichen symbionts

Classification of lichen symbionts by the analysis of their ribosomal markers showed that, in the 50 samples of the two forest sites, there was a total of six mycobiont (M1, M2, M4, M5, M6 and M8) and five cyanobiont (C01, C03, C10, C12 and C14) haplotypes, whose names correspond to those in Zúñiga et al. (2015). The distribution of symbiont pairs in the *Peltigera thalli* is shown in Table 1 (e.g. pair M5-C01 was found in 10 thalli in site 1 and 11 times in site 2). Among the mycobionts, M5 and M6 were the most abundant, with 25 (50%) and 18 (36%) occurrences, respectively. In the case of cyanobionts, C01 was clearly the most abundant with 39 occurrences, and was also the only one present at both forest sites.

Mycobiont identities, based on phylogenetic analysis, correspond to those already reported in Zúñiga et al. (2015). The closest species (or group of them) to each mycobiont haplotype was as follows: M1 was related to *P. ponojensis*, M2 to *P. extenuata*, M4 to *P. rufescens*, M5 to *P. canina* group (species *P. boreorufescens*, *P. canina*, *P. evansiana*, *P. fuscopraetextata*, *P. pallidorufescens* and *P. praetextata*), M6 to *P. frigida* and M8 to *P. hymenina* group (species

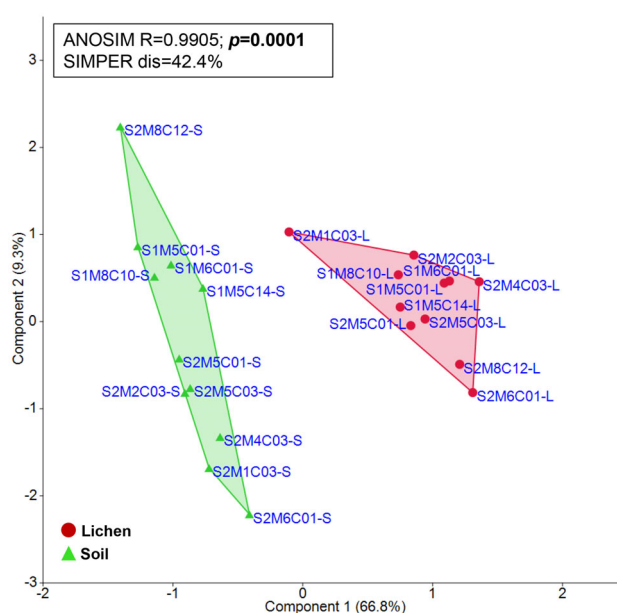

Figure 1. Multivariate PCA of the genetic structures of the bacterial communities. Profiles were obtained for each sample by TRFLP of the bacterial 16S rRNA genes, but excluding plastids and cyanobacteria, cut with three restriction enzymes. Lichen bacterial microbiota is indicated with red circles and soil bacterial microbiota with green triangles. In the box, the R and p values of ANOSIM and the dissimilarity value of SIMPER are indicated.

*P. hymenina*, *P. occidentalis*, *P. pacifica*, *P. polydactylon*, *P. pulverulenta* and *P. scabrossella*).

### Lichen products

The lichen products assessed as potential descriptors of bacterial communities were metabolite diversity and phenoloxidase activity. Regarding the former, the color of the spots had previously been reported as a distinctive characteristic of lichen metabolites: orange for depsidones, blue for benzofurans and gray for fatty acids; meanwhile, sulfuric acid reaction reveals depsides and tridepsides (Culbertson 1972).

Even though the spots on the 2D-TLC plates were lost after a short time of air dried, they could still be recorded and analyzed by a neighbor-joining grouping analysis, where eight different groups were obtained according to the similarities between the characteristics of the spots (i.e. Rf, color and sulfuric acid reaction). Then, considering the number of spots in these eight groups, the metabolite diversity in each sample was calculated. Statistically significant differences were not observed when comparing the metabolite diversity among different samples (Table S1, Supporting Information).

On the other hand, phenoloxidase activity of each composite sample showed values ranging from 9 to 113  $\text{Ug}^{-1}$ , with a mean value of 60  $\text{Ug}^{-1}$  of total protein. Among the 11 samples, phenoloxidase activity from sample S1M5C14 was significantly lower than the activity from S2M1C03 (Table S1).

### Structure of bacterial communities

Genetic structures of lichen and soil microbiota were obtained for each sample by TRFLP with three different restriction enzymes. These profiles were analyzed by PCA (Fig. 1), where they were clearly separated in two groups, depending on the origin of the bacterial community (lichen or soil), with a SIMPER

**Table 2.** Genetic structure (TRFLP) data grouping analysis including results of ANOSIM (R and *p* values) and SIMPER (% of dissimilarity) multivariate analysis of samples grouped according to the site where they come from, and the mycobiont and the cyanobiont previously identified in the lichen thallus.

| Origin | Grouped by | ANOSIM R | ANOSIM <i>p</i> | SIMPER dissimilarity (%) |
|--------|------------|----------|-----------------|--------------------------|
| Lichen | Site       | -0.1349  | 0.8073          | 23.2                     |
|        | Mycobiont  | 0.4628   | <b>0.0421</b>   | 24.8                     |
|        | Cyanobiont | 0.1667   | 0.2073          | 24.5                     |
| Soil   | Site       | 0.1984   | 0.0965          | 15.4                     |
|        | Mycobiont  | 0.2340   | 0.1797          | 15.1                     |
|        | Cyanobiont | 0.3798   | <b>0.0366</b>   | 15.5                     |

Significant *p* values at the *p* < 0.05 level are in bold.

**Table 3.** Metabolic structure (CLPP) data grouping analysis including results of ANOSIM (R and *p* values) and SIMPER (% of dissimilarity) multivariate analysis of samples grouped according to the site where they come from, and the mycobiont and the cyanobiont previously identified in the lichen thallus.

| Origin | Grouped by | ANOSIM R | ANOSIM <i>p</i> | SIMPER dissimilarity (%) |
|--------|------------|----------|-----------------|--------------------------|
| Lichen | Site       | -0.0053  | 0.4212          | 62.6                     |
|        | Mycobiont  | 0.6436   | <b>0.0090</b>   | 68.3                     |
|        | Cyanobiont | 0.2868   | 0.1031          | 67.3                     |
| Soil   | Site       | 0.7619   | <b>0.0055</b>   | 69.2                     |
|        | Mycobiont  | -0.1809  | 0.7841          | 53.4                     |
|        | Cyanobiont | 0.4109   | <b>0.0459</b>   | 58.4                     |

Significant *p* values at the *p* < 0.05 level are in bold.

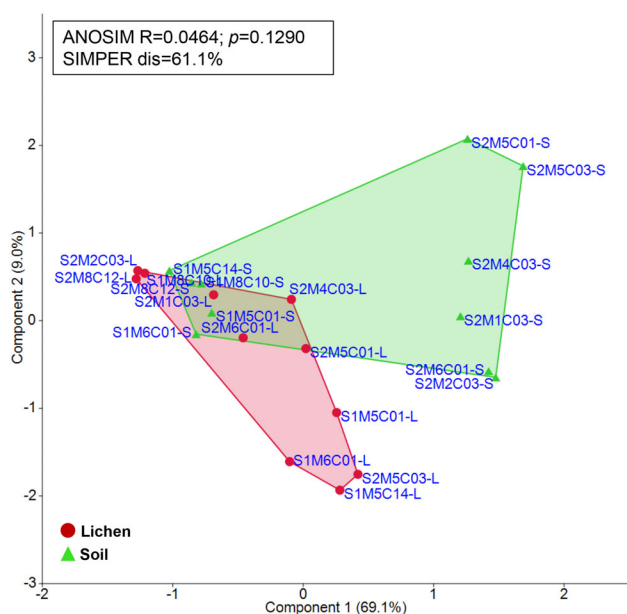

**Figure 2.** Multivariate PCA of the metabolic structures of the bacterial communities. Profiles were obtained for each sample by CLPP obtained using EcoPlate (BioLog). Lichen bacterial microbiota is indicated with red circles and soil bacterial microbiota with green triangles. In the box, the R and *p* values of ANOSIM and the dissimilarity value of SIMPER are indicated.

overall dissimilarity of 42.4%. ANOSIM confirmed this difference ( $R = 0.9905$ ) with a statistically significant *p* value (0.0001). In order to analyze the association of location and symbiont identities with genetic bacterial structure, data were grouped by site, mycobiont and cyanobiont identity. In Table 2, ANOSIM and SIMPER analyses of the grouped TRFLP data are shown. The genetic structure of the microbiota of lichens was different depending on the mycobiont that was present in the thallus, whilst in the case of the genetic structure of the soil microbiota, the differences were observed depending on the cyanobiont present in the lichen.

Analogous to the genetic structure, metabolic profiles obtained using EcoPlate (BioLog), were analyzed by PCA (Fig. 2), and they did not show differences in an ANOSIM analysis ( $R = 0.0464$ ) according to the origin of the bacterial community (lichen or soil); however, both groups showed a SIMPER overall dissimilarity of 61.1%. Then, data were grouped by site and symbiont identities, and results of ANOSIM and SIMPER

analysis of the grouped CLPP data are shown in Table 3. The metabolic profiles showed differences when were grouped by mycobiont. On the other hand, differences were also observed when the metabolic structure of soil microbiota was grouped by site and by cyanobiont.

In order to analyze if levels of metabolite diversity and phenoloxidase activity were related to genetic and metabolic structures measured by the Shannon index, linear regression analyses were carried out. Metabolite diversity was inversely related to the genetic structure of both lichen (Fig. 3a) and soil microbiota (Fig. 3b). However, phenoloxidase activity levels were only inversely related to the metabolic structure, in this case just with the one associated with the lichen microbiota (Fig. 3g).

## DISCUSSION

The lichen samples of this study (i.e. samples from Coyhaique) consisted in a subset of those from Zúñiga et al. (2015), which also included samples from other localities in Southern Chile and Antarctica. In particular, *Peltigera* lichens from Coyhaique represented 6 out of the total of 8 different mycobionts and 5 out of the total of 15 different cyanobionts reported in that work. In the case of the mycobionts, this high representativeness is consistent with the distribution patterns (Martínez et al. 2003) of at least the two most frequent mycobionts in both Coyhaique sites: M5 (*P. canina* group) and M6 (*P. frigida*), whose habitat has been described to be related to woodlands (Brodo, Scharnoff and Scharnoff 2001; Quilhot et al. 2012). Conversely, mycobionts M1, M2 and M4 were found exclusively in site 2, agreeing with reports of *P. ponojensis*, *P. extenuata* and *P. rufescens* mainly in open and disturbed sites (Brodo, Scharnoff and Scharnoff 2001). In contrast, regarding the cyanobionts, their low representativeness in Coyhaique might be explained by cyanobacterial endemism. In fact, cyanobiont C01 was clearly the most common in this study location (39 out of 50 thallus samples, 78%) and, aside from Coyhaique site, it was present only in a specimen from Navarino (one out of 60, 1.7%) (Zúñiga et al. 2015). It must be taken into account that the variation among lichen photobionts could be the result of photobiont-mediated guilds, which consist on a common pool of photobionts that could be forming a horizontally linked community of lichens growing in the same habitat (Rikkinen 2003; Dal Grande et al. 2014; Cornejo and Scheidegger 2016).

On the other hand, we studied the structure of bacterial communities associated with *Peltigera* lichens from Coyhaique (i.e. lichen and soil microbiota) through genetic and metabolic fingerprint-based approaches. Although some caveats and

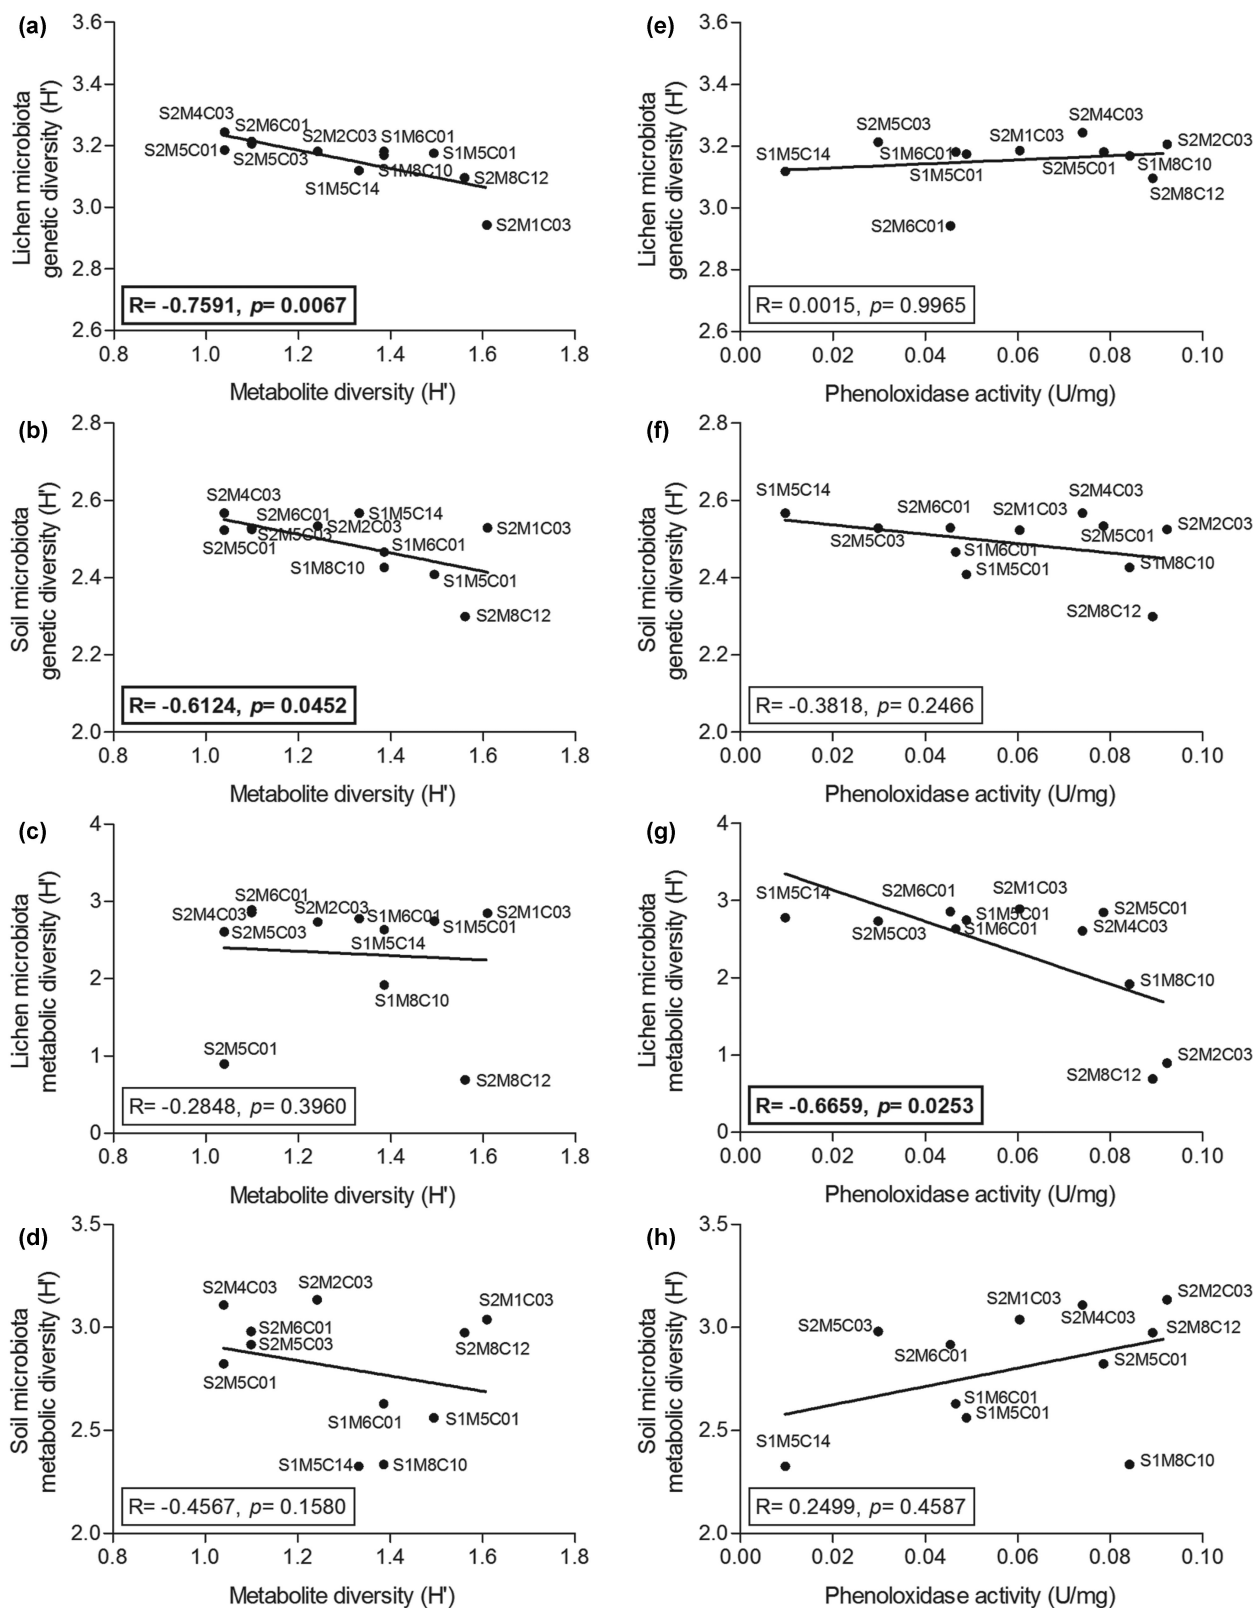

**Figure 3.** Linear regression analyses between lichen products and bacterial communities. The left panel shows the linear regression analyses between metabolite diversity and (a) genetic structure of lichen microbiota, (b) genetic structure of soil microbiota, (c) metabolic structure of lichen microbiota and (d) metabolic structure of soil microbiota. The right panel shows the linear regression analyses between phenoloxidase activity and (e) genetic structure of lichen microbiota, (f) genetic structure of soil microbiota, (g) metabolic structure of lichen microbiota and (h) metabolic structure of soil microbiota. Samples are plotted as points with the corresponding key name (S: site, M: microbiont, C: cyanobiont). R and p values for each linear regression are indicated in the lower left corner of each graph area, and shown in bold letters when significant.

limitations such as those associated with DNA extraction (Martin-Laurent et al. 2001), PCR amplification (Wilson 1997), molecular marker copy numbers (Crosby and Criddle 2003) and culture-dependence in the case of BIOLOG<sup>®</sup> assays (Orlando et al. 2007) need to be addressed, fingerprinting is still a valuable tool to assess changes in microbial community diversity by allowing cost-effective analyses of several samples and, thus, to develop robust answers (van Dorst et al. 2014; Almasia et al. 2016). In this work, the use of the TRFLP technique with three different restriction enzymes allows variance estimation of closely related bacterial groups, reaching similar findings as other common methods such as DGGE (denaturing gradient gel electrophoresis) and SSCP (single-stranded conformational polymorphism) (Smalla et al. 2007). In addition, the CLPP assay, based on EcoPlate (BioLog), offers the potential to explore functional traits of microbial communities. To our knowledge, this carbon source utilization approach was only used to describe bacterial communities associated with lichens in the context of biological soil crusts, which are known to harbor more complex communities than a single lichen thallus (Yu et al. 2012; Bastida et al. 2014).

The microbiota of lichens was clearly distinct from the microbiota of soils in their genetic structure, proving the hypothesis that lichen microbiota is not a mere extension of the microbial communities present in the substrate where lichens grow. In this regard, several studies have shown that the identity of the symbionts influences the diversity of the microbial communities closely associated with lichens (Grube and Berg 2009; Bates et al. 2011; Hodkinson et al. 2012), but they rarely studied which specific lichen intrinsic factors could be causing that impact.

In order to assess in what way the lichen microenvironment affects the bacterial community structure, we measured two well-known lichen factors: metabolite production (Molnár and Farkas 2010) and phenoloxidase activity (Beckett, Zavarzina and Liers 2013). As expected, the microbiota of lichens had different structure depending on the mycobiont identity at both genetic and metabolic levels. In turn, inverse relations were found between the diversity of lichen metabolites and the bacterial genetic structure, and also between the phenoloxidase activity and the bacterial metabolic structure. These different effects could be explained by the specific action of metabolites (Karazog et al. 2009; Mitrović et al. 2011) versus the generalist impact of oxidative products on sensitive bacterial populations (Lisov et al. 2012).

In the case of the soil microbiota, an environmental significant influence, i.e. that caused by lichen extrinsic factors attributable to the site of the forest where the lichens grow, was observed at the metabolic structure level. These differences could be explained by the influence of surrounding areas or by diversity patterns of *Peltigera* species found in both sites, which would involve other intrinsic factors to those studied here. To the extent of our knowledge, the influence of this kind of factors on the lichen-associated soil microbiota has been previously assessed only considering the conservation state of forests in Tierra del Fuego Island (Ramírez-Fernández et al. 2014). However, an environmental effect on the structure of the lichen microbiota at a genetic level, due to geographical location, has been observed before in lichen communities but from very distant sites (up to 7700 Km) (Cardinale et al. 2012; Hodkinson et al. 2012). Strikingly, lichen intrinsic factors, i.e. those affecting the lichen microenvironment, showed an influence also on the structure of soil microbiota, at both metabolic and genetic levels. One of them was the metabolite production and another one was the cyanobiont identity.

The effect of metabolite diversity, not only on the lichen microbiota but also on the soil microbiota (Akpınar, Oztürk and Sinirtas 2009), evidences the far-reaching influence of these lichen products. In fact, metabolite effects over bacterial communities have been shown even using a single molecule at physiological concentration levels in an experimental assay tested by TRFLP (Persson et al. 2011). Conversely, phenoloxidase activity was not related to the structure of soil microbiota, indicating its more generalist impact just only in the vicinity of the lichen thallus, which could be related rather to a metabolic resistance of the bacterial communities (Baldrian 2004), probably due to the biological ubiquity of the activities of these enzymes.

On the other hand, the cyanobiont identity effect over soil communities is an unexpected result considering that lichens are mainly conformed by fungal biomass. Photobiont influence on bacterial communities closely related to lichen thalli has been described before by Hodkinson et al. (2012), but just according to the photobiont type (i.e. cyanobacterial or green-algal symbiont). These authors discuss that photosynthetic rates and nitrogen-fixing capabilities of the photobionts could result in different available concentrations of carbon and nitrogen for the holobiont, which in turn can lead to a bacterial community differentiation. An alternative explanation could be that lichen substrates might be enriched in cyanobionts from the lichens, since lichen thalli are a recognized source of photobionts in horizontal transmission or in photobiont switching (Rikkinen 2003; Muggia et al. 2013); however, further evaluation of the availability of potential cyanobionts in the substrate microbiota is necessary. In this context, Delgado-Baquerizo et al. (2015) found a positive relation between nutrient concentration (carbon, nitrogen and phosphorus) in biocrust-forming lichen thalli and the substrate below them. It seems reasonable then to propose that differences in carbon and nitrogen-fixing rates between photobionts could generate different nutrient availabilities to microbial communities in the soil below lichens (Knowles, Pastor and Biesboer 2006), and while in our work only *Nostoc* cyanobionts were analyzed, intragenetic metabolic differences could occur. Although soil factors (e.g. water content, pH and cation exchange capacity) certainly impact soil microbial composition (Docherty et al. 2015), these factors could become less important in the case of soils influenced by lichens (Delgado-Baquerizo et al. 2015). In fact, it is possible that lichens recruit their associated microbiota from soil similarly as plants do through their rhizosphere, creating particular environmental conditions for the survival of specific bacterial groups (Philippot et al. 2013).

In conclusion, lichen products can structure even the soil bacterial communities present below them, highlighting their role as possible drivers of natural microenvironmental conditions and evidencing the need of further analyses about how particular soil microbial communities are being shaped by lichens upon them.

## SUPPLEMENTARY DATA

Supplementary data are available at FEMSEC online.

## ACKNOWLEDGEMENTS

The authors want to sincerely thank J.L. Parraguez for his valuable fieldwork assistance, M. de Armas for her expert advice on the enzyme activity measurements, C. Zúñiga for the revision of the English language, M. Méndez for his advice in answering comments concerning statistics during the

revision of the manuscript and to D. Cotorás, F. Chávez and S. Álvarez for their comments improving previous versions of this work. The authors also thank the careful revisions made by anonymous peer reviewers. Sample collection in the Coyhaique National Reserve was authorized by the National Forestry Corporation (CONAF, Chile).

## FUNDING

This work was supported by Comisión Nacional de Investigación Científica y Tecnológica (CONICYT, Chilean National Commission for Scientific and Technological Research) - Fondo Nacional de Desarrollo Científico y Tecnológico (FONDECYT, Chilean National Fund for Scientific and Technological Development) [11100381].

**Conflict of interest.** None declared.

## REFERENCES

- Akpinar AU, Ozturk S, Sinirtas M. Effects of some terricolous lichens [*Cladonia rangiformis* Hoffm., *Peltigera neckerii* Hepp ex Müll. Arg., *Peltigera rufescens* (Weiss) Humb.] on soil bacteria in natural conditions. *Plant Soil Environ* 2009;**55**: 154–8.
- Almasia R, Carú M, Handford M et al. Environmental conditions shape soil bacterial community structure in a fragmented landscape. *Soil Biol Biochem* 2016;**103**:39–45.
- Aschenbrenner IA, Cernava T, Berg G et al. Understanding microbial multi-species symbioses. *Front Microbiol* 2016;**7**:1–9.
- Baldrian P. Increase of laccase activity during interspecific interactions of white-rot fungi. *FEMS Microbiol Ecol* 2004;**50**: 245–53.
- Bastida F, Jehmlich N, Ondoño S et al. Characterization of the microbial community in biological soil crusts dominated by *Fulgensia desertorum* (Tomin) Poelt and *Squammarina cartilaginea* (With.) P. James and in the underlying soil. *Soil Biol Biochem* 2014;**76**:70–9.
- Bates ST, Cropsey GWG, Caporaso JG et al. Bacterial communities associated with the lichen symbiosis. *Appl Environ Microb* 2011;**77**:1309–14.
- Beckett RP, Minibayeva FV, Vylegzhana NN et al. High rates of extracellular superoxide production by lichens in the suborder Peltigerineae correlate with indices of high metabolic activity. *Plant Cell Environ* 2003;**26**:1827–37.
- Beckett RP, Zavarzina AG, Liers C. Oxidoreductases and cellulases in lichens: Possible roles in lichen biology and soil organic matter turnover. *Fungal Biol* 2013;**117**:431–8.
- Bjelland T, Grube M, Hoem S et al. Microbial metacommunities in the lichen-rock habitat. *Environ Microbiol Rep* 2011;**3**:434–42.
- Boustie J, Grube M. Lichens—a promising source of bioactive secondary metabolites. *Plant Genet Resour Characterization Util* 2005;**3**:273–87.
- Brodo IM, Sharnoff SD, Sharnoff S. *Lichens of North America*. New Heaven and London: Yale University Press, 2001.
- Cardinale M, Grube M, Castro JV et al. Bacterial taxa associated with the lung lichen *Lobaria pulmonaria* are differentially shaped by geography and habitat. *FEMS Microbiol Lett* 2012;**329**:111–5.
- Cardinale M, Vieira de Castro J, Müller H et al. In situ analysis of the bacterial community associated with the reindeer lichen *Cladonia arbuscula* reveals predominance of Alphaproteobacteria. *FEMS Microbiol Ecol* 2008;**66**:63–71.
- Castillo-Monroy AP, Bowker MA, Maestre FT et al. Relationships between biological soil crusts, bacterial diversity and abundance, and ecosystem functioning: Insights from a semi-arid Mediterranean environment. *J Veg Sci* 2011;**22**:165–74.
- Cernava T, Müller H, Aschenbrenner IA et al. Analyzing the antagonistic potential of the lichen microbiome against pathogens by bridging metagenomic with culture studies. *Front Microbiol* 2015;**6**:1–11.
- Cornejo C, Scheidegger C. Cyanobacterial gardens: the liverwort *Frullania asagrayana* acts as a reservoir of lichen photobionts. *Environ Microbiol Rep* 2016;**8**:352–7.
- Crosby LD, Criddle CS. Understanding bias in microbial community analysis techniques due to rrn operon copy number heterogeneity. *Biotechniques* 2003;**34**:790–802.
- Culbertson CF. Improved conditions and new data for identification of lichen products by standardized thin-layer chromatographic method. *J Chromatogr A* 1972;**72**:113–25.
- Dal Grande F, Beck A, Cornejo C et al. Molecular phylogeny and symbiotic selectivity of the green algal genus *Dictyochloropsis* s.l. (Trebouxiophyceae): a polyphyletic and widespread group forming photobiont-mediated guilds in the lichen family Lobariaceae. *New Phytol* 2014;**202**:455–70.
- Delgado-Baquerizo M, Gallardo A, Covelo F et al. Differences in thallus chemistry are related to species-specific effects of biocrust-forming lichens on soil nutrients and microbial communities. *Funct Ecol* 2015;**29**:1087–98.
- Docherty KM, Borton HM, Espinosa N et al. Key edaphic properties largely explain temporal and geographic variation in soil microbial communities across four biomes. *PLoS One* 2015;**10**:e0135352.
- Grube M, Berg G. Microbial consortia of bacteria and fungi with focus on the lichen symbiosis. *Fungal Biol Rev* 2009;**23**:72–85.
- Grube M, Cardinale M, de Castro JV et al. Species-specific structural and functional diversity of bacterial communities in lichen symbioses. *ISME J* 2009;**3**:1105–15.
- Grube M, Cernava T, Soh J et al. Exploring functional contexts of symbiotic sustain within lichen-associated bacteria by comparative omics. *ISME J* 2015;**9**:412–24.
- Hammer Ø, Harper D, Ryan P. PAST: paleontological statistics software package for education and data analysis. *Palaeontol Electron* 2001;**4**:1–9.
- Hodkinson BP, Gottel NR, Schadt CW et al. Photoautotrophic symbiont and geography are major factors affecting highly structured and diverse bacterial communities in the lichen microbiome. *Environ Microbiol* 2012;**14**:147–61.
- Hodkinson BP, Lutzoni F. A microbiotic survey of lichen-associated bacteria reveals a new lineage from the Rhizobiales. *Symbiosis* 2009;**49**:163–80.
- Insam H, Goberna M. Use of Biolog® for the community level physiological profiling (CLPP) of environmental samples. In: Kowalchuk GA, de Bruijn FJ, Head IM et al. (eds). *Molecular Microbial Ecology Manual*. 2nd ed. Dordrecht: Springer Netherlands, 2004, 853–60.
- Karagoz A, Dogruoz N, Zeybek Z et al. Antibacterial activity of some lichen extracts. *J Med Plants Res* 2009;**3**:1034–9.
- Knowles RD, Pastor J, Biesboer DD. Increased soil nitrogen associated with dinitrogen-fixing, terricolous lichens of the genus *Peltigera* in northern Minnesota. *Oikos* 2006;**114**: 37–48.
- Laufer Z, Beckett RP, Minibayeva FV et al. Occurrence of laccases in lichenized ascomycetes of the Peltigerineae. *Mycol Res* 2006;**110**:846–53.
- Lisov A, Zavarzina AG, Zavarzin AA et al. Dimeric and monomeric laccases of soil-stabilizing lichen *Solorina crocea*: Purification,



- properties and reactions with humic acids. *Soil Biol Biochem* 2012;**45**:161–7.
- Lokajová V, Bačkorová M, Bačkor M. Allelopathic effects of lichen secondary metabolites and their naturally occurring mixtures on cultures of aposymbiotically grown lichen photobiont *Trebouxia erici* (Chlorophyta). *South African J Bot* 2014;**93**:86–91.
- Maier S, Schmidt TSB, Zheng L et al. Analyses of dryland biological soil crusts highlight lichens as an important regulator of microbial communities. *Biodivers Conserv* 2014;**23**: 1735–55.
- Manojlović N, Ranković B, Kosanić M et al. Chemical composition of three *Parmelia* lichens and antioxidant, antimicrobial and cytotoxic activities of some their major metabolites. *Phytomedicine* 2012;**19**:1166–72.
- Martínez I, Burgaz AR, Vitikainen O et al. Distribution patterns in the genus *Peltigera* Willd. *Lichenologist* 2003;**35**:301–23.
- Martin-Laurent F, Philippot L, Hallet S et al. DNA extraction from soils: old bias for new microbial diversity analysis methods. *Appl Environ Microb* 2001;**67**:2354–9.
- Menlove JE. Thin-layer chromatography for the identification of lichen substances. *Br Lichen Soc Bull* 1974;**34**:3–5.
- Miadlikowska J, Lutzoni F. Phylogenetic revision of the genus *Peltigera* (lichen-forming Ascomycota) based on morphological, chemical, and large subunit nuclear ribosomal DNA data. *Int J Plant Sci* 2000;**161**:925–58.
- Mitrović T, Stamenković S, Cvetković V et al. Antioxidant, antimicrobial and antiproliferative activities of five lichen species. *Int J Mol Sci* 2011;**12**:5428–48.
- Molnár K, Farkas E. Current results on biological activities of lichen secondary metabolites: A review. *Z Naturforsch C* 2010;**65**:157–73.
- Muggia L, Vancurova L, Škaloud P et al. The symbiotic playground of lichen thalli - a highly flexible photobiont association in rock-inhabiting lichens. *FEMS Microbiol Ecol* 2013;**85**:313–23.
- Orlando J, Chávez M, Bravo L et al. Effect of *Colletia hystrix* (Clos), a pioneer actinorhizal plant from the Chilean matorral, on the genetic and potential metabolic diversity of the soil bacterial community. *Soil Biol Biochem* 2007;**39**:2769–76.
- Persson F, Svensson R, Nylund GM et al. Ecological role of a seaweed secondary metabolite for a colonizing bacterial community. *Biofouling* 2011;**27**:579–88.
- Philippot L, Raaijmakers JM, Lemanceau P et al. Going back to the roots: the microbial ecology of the rhizosphere. *Nat Rev Microbiol* 2013;**11**:789–99.
- Printzen C, Fernández-Mendoza F, Muggia L et al. Alphaproteobacterial communities in geographically distant populations of the lichen *Cetraria aculeata*. *FEMS Microbiol Ecol* 2012;**82**:316–25.
- Quilhot W, Cuellar M, Díaz R et al. Lichens of Aisen, Southern Chile. *Gayana Bot* 2012;**69**:57–87.
- Ramírez-Fernández L, Zúñiga C, Carú M et al. Environmental context shapes the bacterial community structure associated to *Peltigera* cyanolichens growing in Tierra del Fuego, Chile. *World J Microb Biot* 2014;**30**:1141–4.
- Ramírez-Fernández L, Zúñiga C, Méndez MA et al. Genetic diversity of terricolous *Peltigera* cyanolichen communities in different conservation states of native forest from southern Chile. *Int Microbiol* 2013;**16**:243–52.
- Rikkinen J. Ecological and evolutionary role of photobiont-mediated guilds in lichens. *Symbiosis* 2003;**34**:99–110.
- Sigurbjörnsdóttir MA, Andrésson ÓS, Vilhelmsson O. Analysis of the *Peltigera membranacea* metagenome indicates that lichen-associated bacteria are involved in phosphate solubilization. *Microbiology* 2015;**161**:989–96.
- Sigurbjörnsdóttir MA, Andrésson ÓS, Vilhelmsson O. Nutrient scavenging activity and antagonistic factors of non-photobiont lichen-associated bacteria: a review. *World J Microb Biot* 2016;**32**:68.
- Smalla K, Oros-Sichler M, Milling A et al. Bacterial diversity of soils assessed by DGGE, T-RFLP and SSCP fingerprints of PCR-amplified 16S rRNA gene fragments: do the different methods provide similar results? *J Microbiol Methods* 2007;**69**: 470–9.
- Spribile T, Tuovinen V, Resl P et al. Basidiomycete yeasts in the cortex of ascomycete macrolichens. *Science* 2016;**353**:488–92.
- Tamura K, Peterson D, Peterson N et al. MEGA5: molecular evolutionary genetics analysis using maximum likelihood, evolutionary distance, and maximum parsimony methods. *Mol Biol Evol* 2011;**28**:2731–9.
- Till-Bottraud I, Fajardo A, Rioux D. Multi-stemmed trees of *Nothofagus pumilio* second-growth forest in Patagonia are formed by highly related individuals. *Ann Bot* 2012;**110**: 905–13.
- Tønnsberg T, Holtan-Hartwig J. Phycotype pairs in *Nephroma*, *Peltigera* and *Lobaria* in Norway. *Nord J Bot* 1983;**3**:681–8.
- van Dorst J, Bissett A, Palmer AS et al. Community fingerprinting in a sequencing world. *FEMS Microbiol Ecol* 2014;**89**:316–30.
- Weisburg WG, Barns SM, Pelletier DA et al. 16S ribosomal DNA amplification for phylogenetic study. *J Bacteriol* 1991;**173**: 697–703.
- Wilson IG. Inhibition and facilitation of nucleic acid amplification. *Appl Environ Microb* 1997;**63**:3741–51.
- Yu J, Kidron GJ, Pen-Mouratov S et al. Do development stages of biological soil crusts determine activity and functional diversity in a sand-dune ecosystem? *Soil Biol Biochem* 2012;**51**: 66–72.
- Zavarzina AG, Zavarzin AA. Laccase and tyrosinase activities in lichens. *Microbiology* 2006;**75**:546–56.
- Zúñiga C, Leiva D, Ramírez-Fernández L et al. Phylogenetic diversity of *Peltigera* cyanolichens and their photobionts in southern Chile and Antarctica. *Microbes Environ* 2015;**30**: 172–9.
- Zwietering MH, Jongenburger I, Rombouts FM et al. Modeling of the bacterial growth curve. *Appl Environ Microb* 1990;**56**: 1875–81.
